# Supplementary material for: The root of the East African cichlid radiations
Source: Springer Nature journal article supplement (doi:10.1186/1471-2148-9-186), 2009-01-01

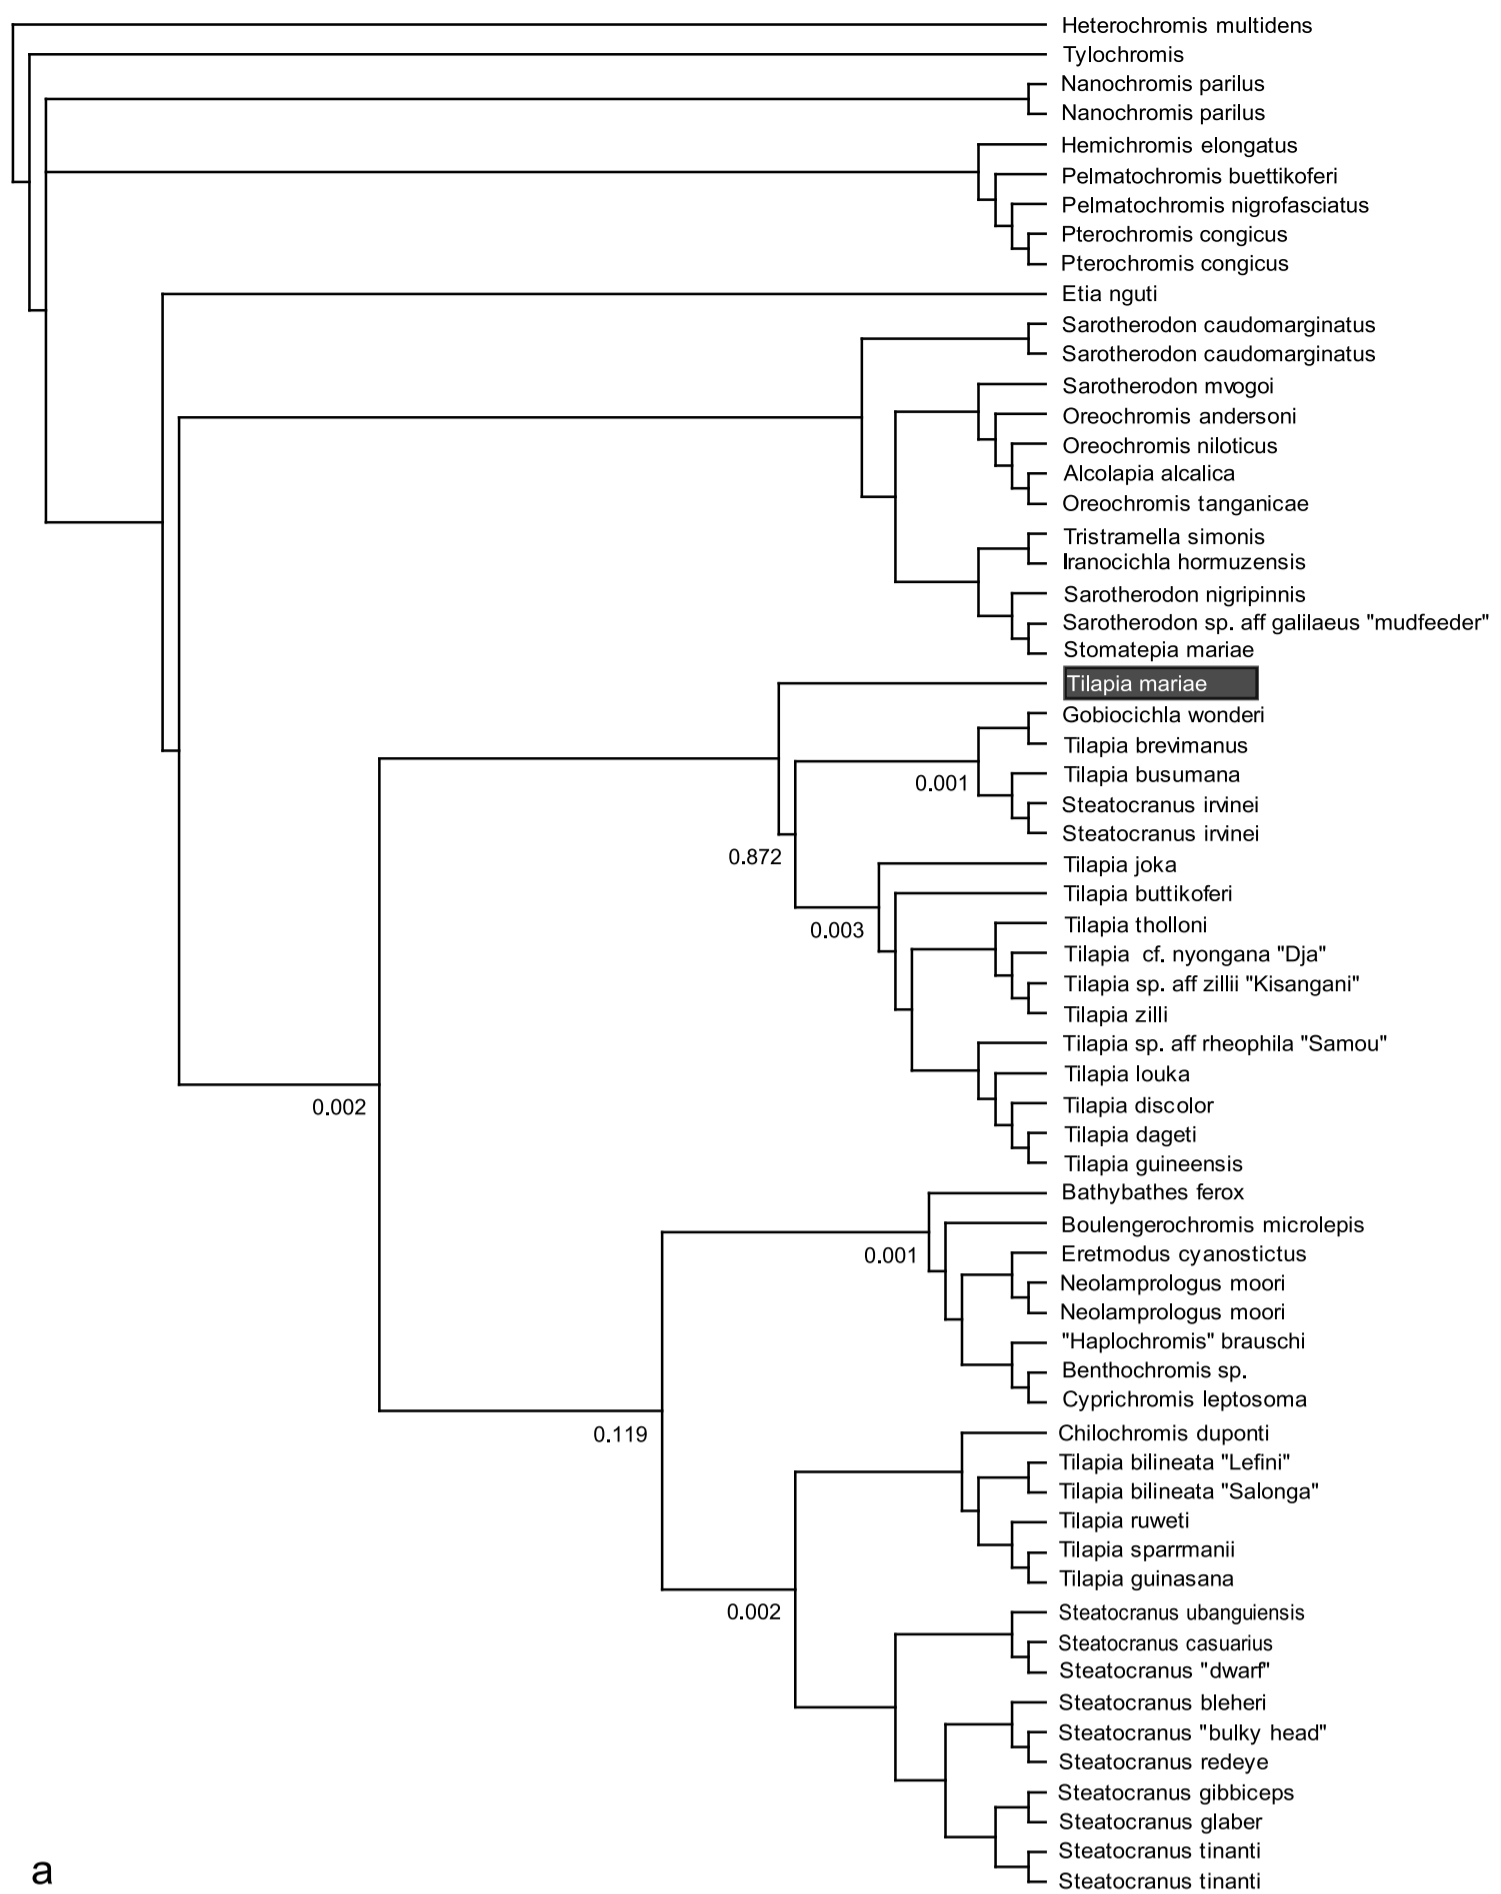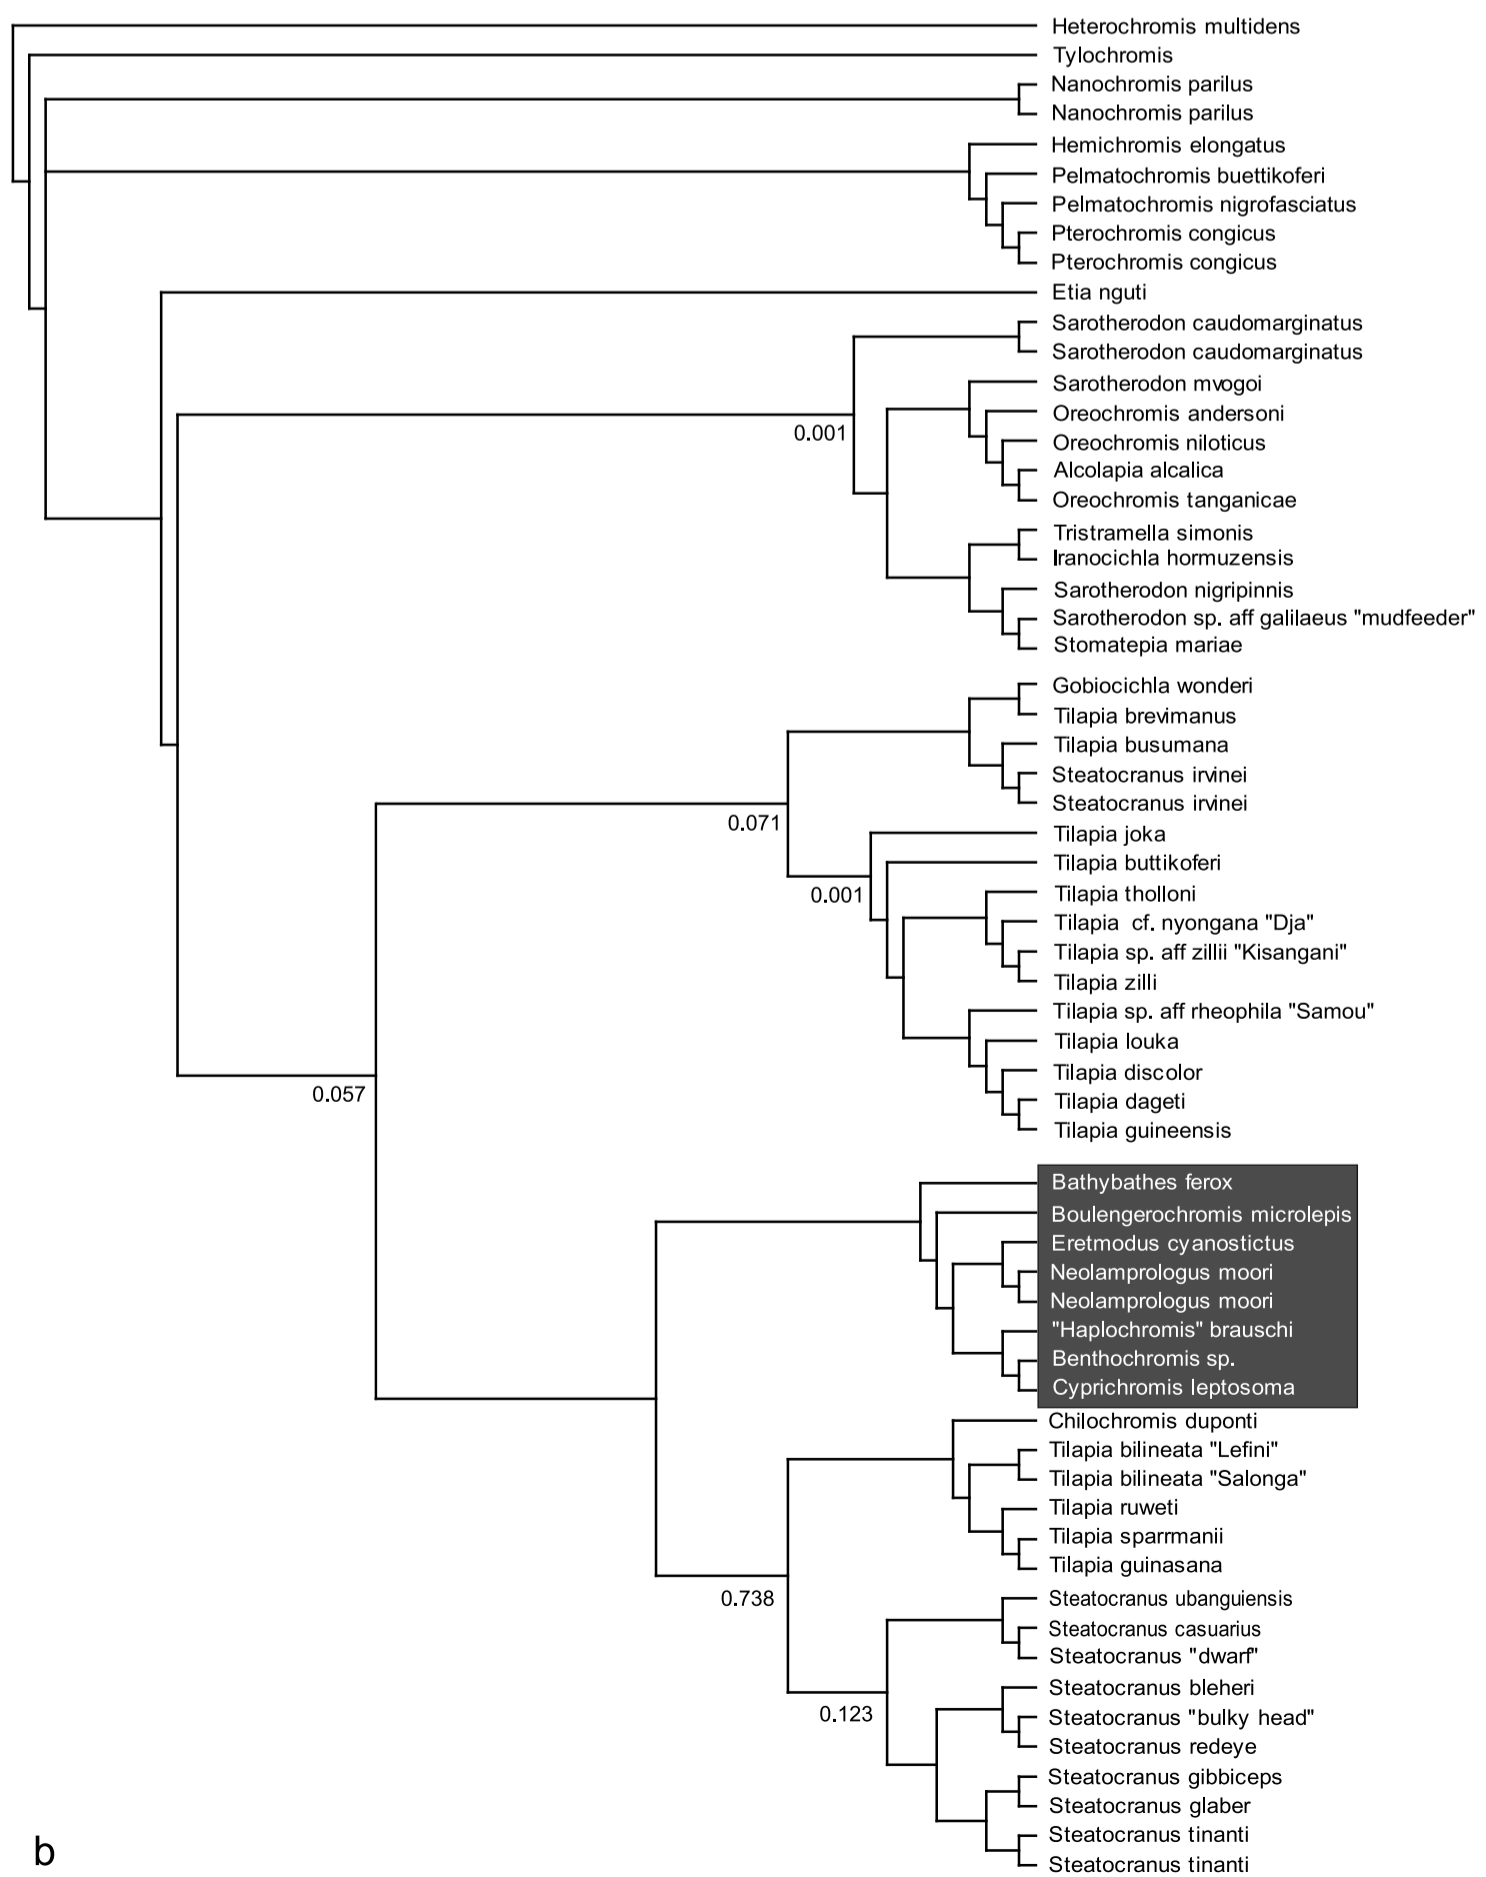

Supplement: 12862_2009_1100_MOESM4_ESM.pdf [file 12862_2009_1100_MOESM4_ESM.pdf]
