# Supplementary material for: The root of the East African cichlid radiations
Source: Springer Nature journal article supplement (doi:10.1186/1471-2148-9-186), 2009-01-01

\* - *T.joka*

50

60

70

80

90

Bootstrap values in percent (1000 replicates)

\* - *T.mariae*

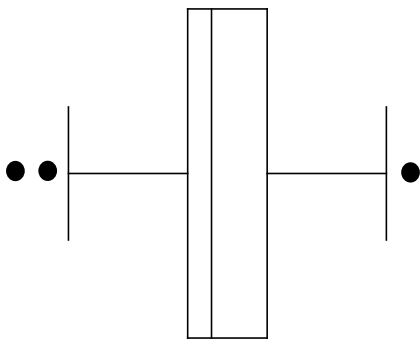

Supplement: 12862_2009_1100_MOESM9_ESM.pdf [file 12862_2009_1100_MOESM9_ESM.pdf]
