# Supplementary material for: The root of the East African cichlid radiations
Source: Springer Nature journal article supplement (doi:10.1186/1471-2148-9-186), 2009-01-01
Supplement: 12862_2009_1100_MOESM11_ESM.pdf [file 12862_2009_1100_MOESM11_ESM.pdf]

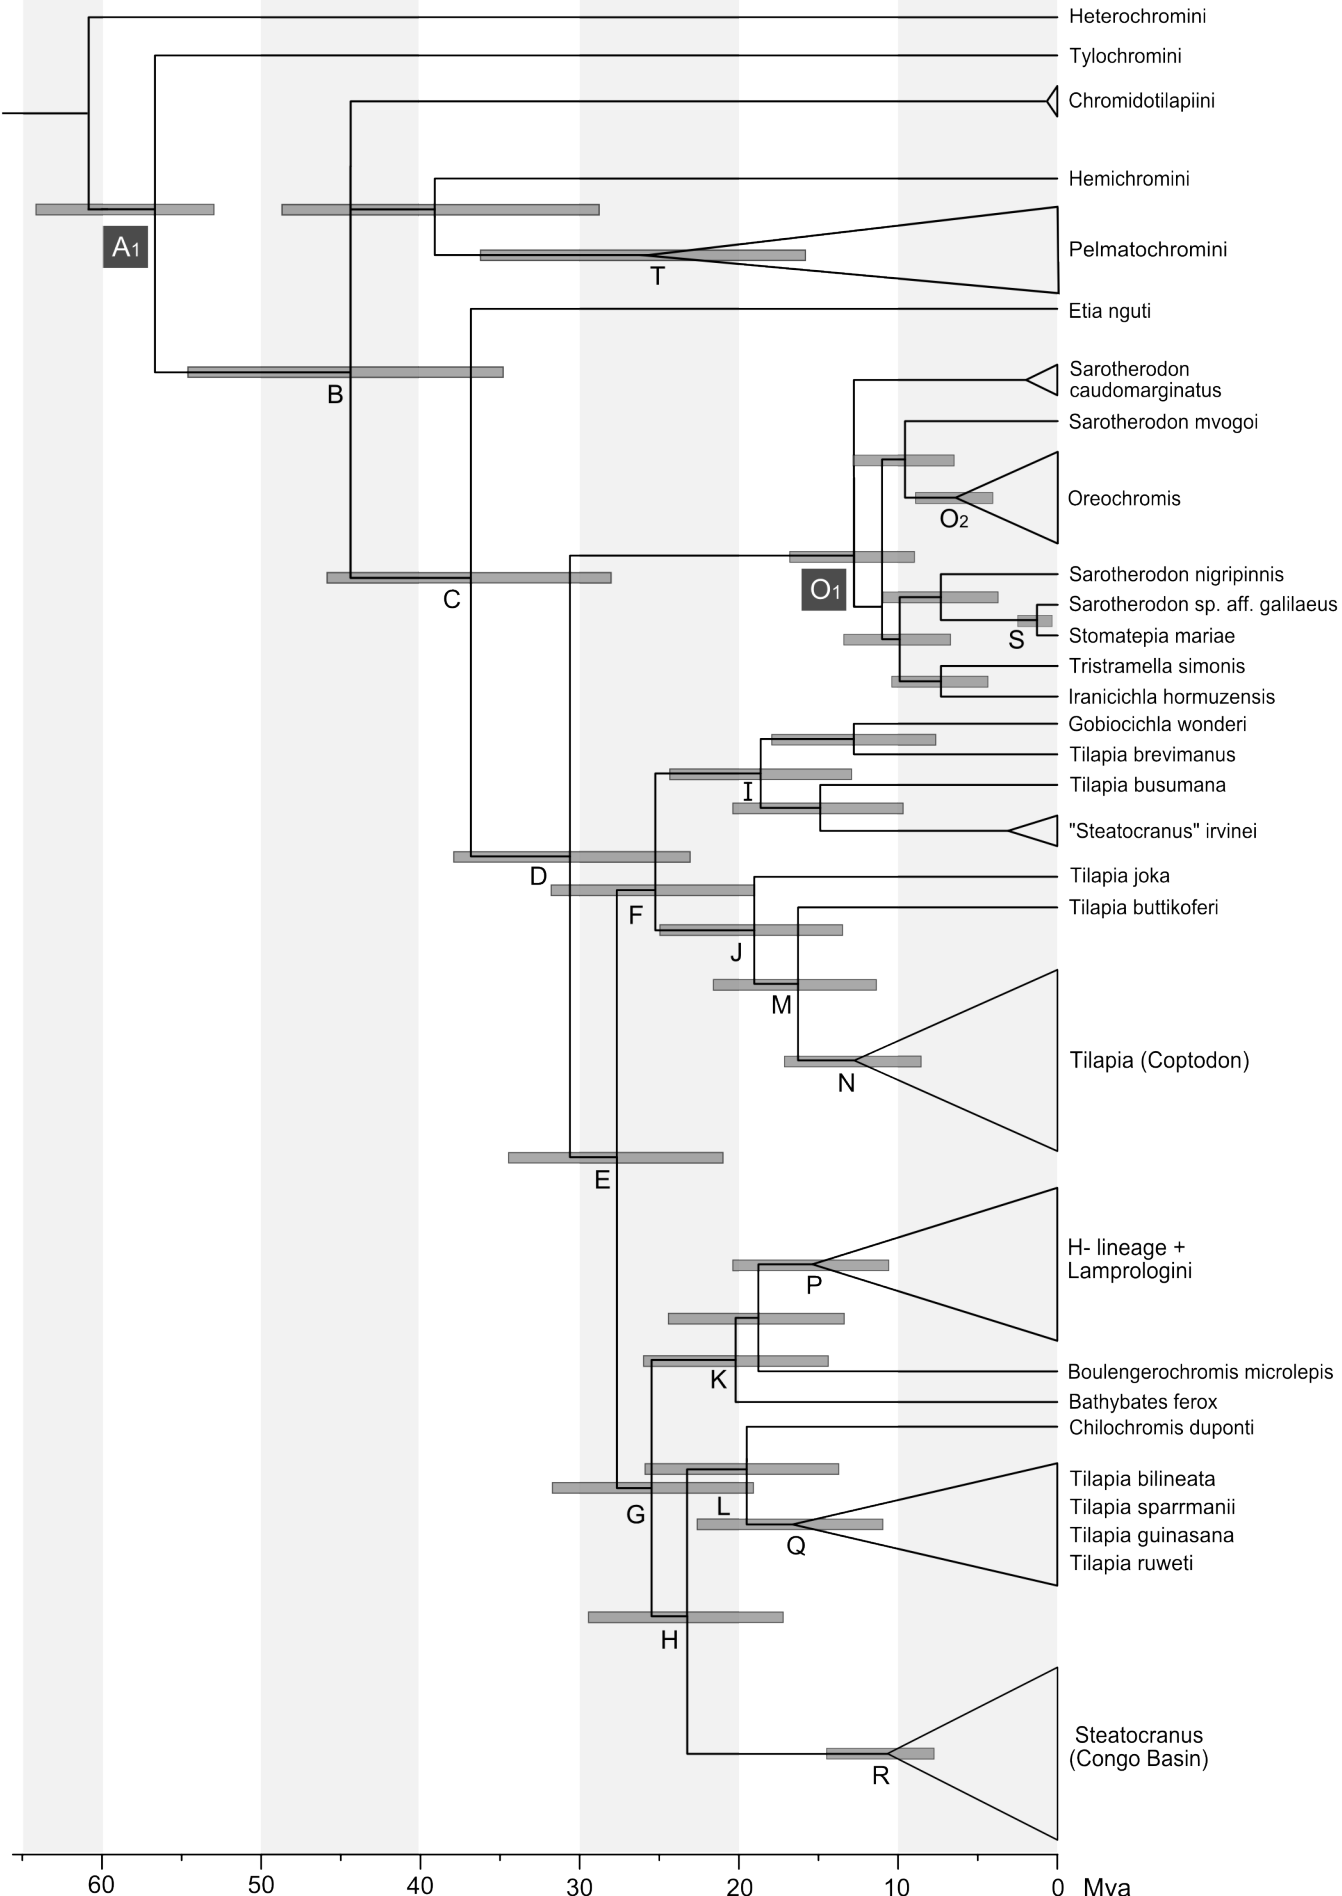

|           |        |           |         |          |            |
|-----------|--------|-----------|---------|----------|------------|
| Paleocene | Eocene | Oligocene | Miocene | Pliocene | Quaternary |
| TERTIARY  |        |           |         |          |            |
